# Supplementary material for: Constraints and incentives in the investment regime: How bargaining power shapes BIT reform
Source: Springer Nature journal article supplement (doi:10.1007/s11558-022-09473-1), 2022-08-03
Supplement: MOESM2 [file 23334926]

## **Online Appendix**

Tuuli-Anna Huikuri, 'Constraints and Incentives in the Investment Regime: How bargaining power shapes BIT reform', *The Review of International Organizations*.

May 2022

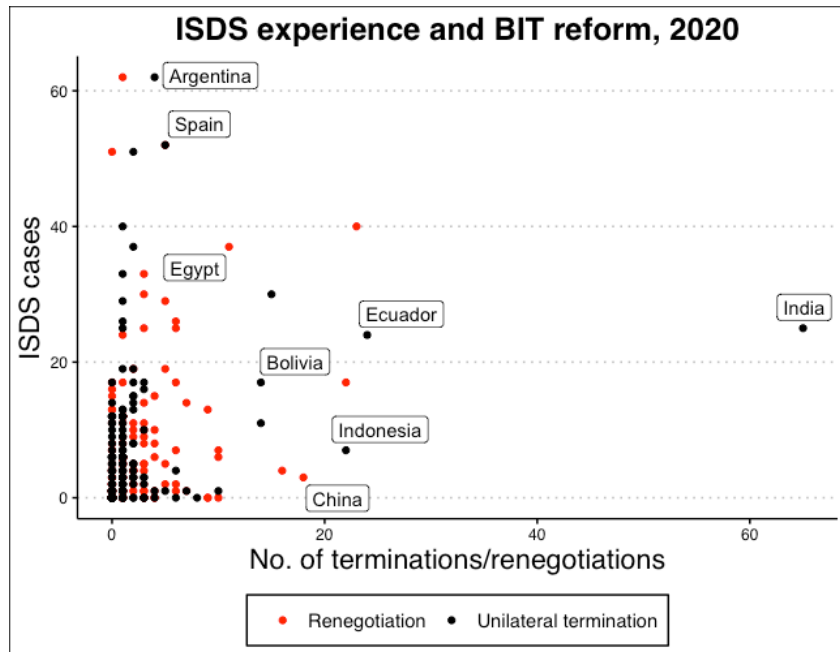

**Figure A1.** States by number of ISDS cases they have been respondents in and the number of terminated and renegotiated BITs they were parties to in 2020.<sup>1</sup>

<sup>1</sup> The pattern looks similar when terminations and renegotiations are counted as proportion of the country's total BITs with the exception of Bolivia, which has the second largest proportion of terminations with 90% of its BITs terminated in 2018.

**Table A1.** Summary Statistics

| Statistic                           | N      | Mean   | St. Dev. | Min    | Max    |
|-------------------------------------|--------|--------|----------|--------|--------|
| Deviation                           | 51,702 | 0.01   | 0.09     | 0      | 1      |
| Renegotiation                       | 51,702 | 0.004  | 0.06     | 0      | 1      |
| Unilateral termination              | 51,702 | 0.003  | 0.06     | 0      | 1      |
| Relative power change               | 43,435 | -0.06  | 0.18     | -1.78  | 1.15   |
| Overtook (stronger)                 | 45,044 | 0.005  | 0.07     | 0.00   | 1.00   |
| Overtook (weaker)                   | 49,672 | 0.02   | 0.13     | 0.00   | 1.00   |
| ISDS Respondent (stronger)          | 51,702 | 0.40   | 1.28     | 0      | 20     |
| ISDS Respondent (weaker)            | 51,702 | 0.39   | 0.97     | 0      | 20     |
| ISDS Respondent cum. (stronger)     | 51,702 | 3.65   | 8.54     | 0      | 62     |
| ISDS Respondent cum. (weaker)       | 51,702 | 3.61   | 7.09     | 0      | 62     |
| ISDS Respondent any (stronger)      | 51,702 | 0.47   | 0.50     | 0      | 1      |
| ISDS Respondent any (weaker)        | 51,702 | 0.60   | 0.49     | 0      | 1      |
| ISDS Home cum. (stronger)           | 51,702 | 10.66  | 20.85    | 0      | 182    |
| ISDS Home cum. (weaker)             | 51,702 | 0.78   | 2.34     | 0      | 35     |
| ISDS total cum.                     | 51,702 | 326.06 | 298.49   | 0      | 1,023  |
| GDP growth (stronger)               | 51,267 | 2.82   | 3.79     | -62.08 | 123.14 |
| GDP growth (weaker)                 | 50,347 | 4.16   | 5.12     | -62.08 | 149.97 |
| Law and Order (stronger)            | 49,281 | 4.79   | 1.04     | 1.00   | 6.00   |
| Law and Order (weaker)              | 42,435 | 3.64   | 1.07     | 0.00   | 6.00   |
| FDI outflows % of GDP (stronger)    | 50,372 | 4.39   | 14.44    | -89.66 | 301.25 |
| FDI outflows % of GDP (weaker)      | 46,273 | 1.42   | 11.04    | -89.66 | 301.25 |
| Democratization (stronger)          | 40,715 | 0.004  | 0.06     | 0.00   | 1.00   |
| Democratization (weaker)            | 39,719 | 0.02   | 0.13     | 0.00   | 1.00   |
| Democ. accountability (stronger)    | 49,281 | 5.05   | 1.47     | 0.00   | 6.00   |
| Democ. accountability (weaker)      | 42,435 | 3.78   | 1.60     | 0.00   | 6.00   |
| Socioeconomic conditions (stronger) | 49,281 | 7.65   | 1.89     | 0.54   | 11.00  |
| Socioeconomic conditions (weaker)   | 42,435 | 5.47   | 1.88     | 0.00   | 11.00  |
| Government stability (stronger)     | 49,281 | 7.97   | 1.53     | 2.17   | 12.00  |
| Government stability (weaker)       | 42,435 | 7.88   | 1.71     | 0.67   | 12.00  |
| Leader transition (stronger)        | 48,180 | 0.23   | 0.42     | 0.00   | 1.00   |
| Leader transition (weaker)          | 47,555 | 0.18   | 0.38     | 0.00   | 1.00   |
| SOLS change (stronger)              | 48,180 | 0.11   | 0.31     | 0.00   | 1.00   |
| SOLS change (weaker)                | 47,555 | 0.10   | 0.30     | 0.00   | 1.00   |
| Leftist executive (stronger)        | 36,888 | 0.43   | 0.49     | 0.00   | 1.00   |
| Leftist executive (weaker)          | 24,788 | 0.55   | 0.50     | 0.00   | 1.00   |
| Bureaucratic quality (stronger)     | 49,281 | 3.18   | 0.92     | 0.00   | 4.00   |
| Bureaucratic quality (weaker)       | 42,435 | 2.01   | 0.79     | 0.00   | 4.00   |
| Intra-EU                            | 51,702 | 0.06   | 0.23     | 0      | 1      |
| Delta SRS ISDS                      | 3,768  | -0.01  | 0.70     | -1.00  | 1.00   |
| Delta SRS Subs.                     | 3,768  | 0.20   | 0.36     | -0.32  | 0.83   |

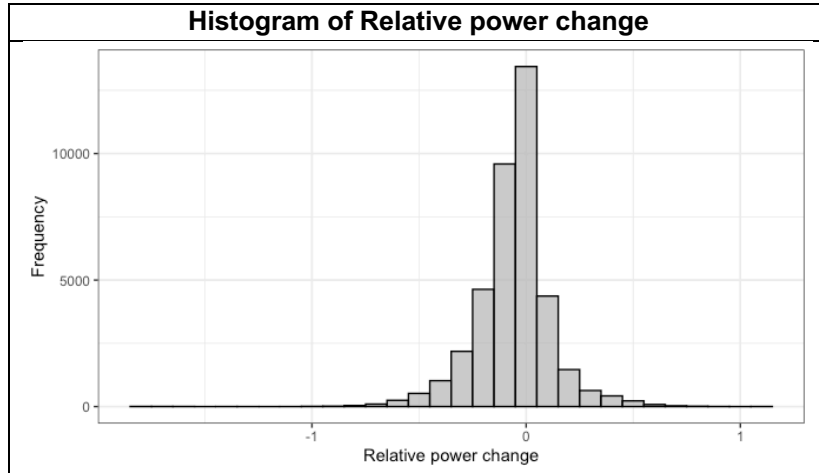

**Figure A2.** Frequency of observations in relative power variable at different levels

**Table A2.** Analysis with Overtook -measure, LPM models, DV = BIT deviation

|                                                 | <b>LPM1</b>                  | <b>LPM2</b>                  | <b>LPM3</b>                  | <b>LPM4</b>                  |
|-------------------------------------------------|------------------------------|------------------------------|------------------------------|------------------------------|
| Overtook (weaker)                               | <b>0.0162**</b><br>(0.0060)  | -0.0179<br>(0.0256)          | <b>0.0246*</b><br>(0.0121)   | 0.0246<br>(0.0212)           |
| Overtook (stronger)                             | 0.0050<br>(0.0154)           | 0.0050<br>(0.0154)           | 0.0030<br>(0.0319)           | 0.0030<br>(0.0102)           |
| ISDS Respondent cum. (stronger)                 | <b>0.0005***</b><br>(0.0001) | <b>0.0005***</b><br>(0.0001) | -0.0000<br>(0.0002)          | -0.0000<br>(0.0003)          |
| ISDS Respondent cum. (weaker)                   | <b>0.0008***</b><br>(0.0001) | <b>0.0008***</b><br>(0.0001) | <b>0.0009***</b><br>(0.0002) | <b>0.0009***</b><br>(0.0003) |
| GDP growth (stronger)                           | <b>0.0003*</b><br>(0.0002)   | <b>0.0003*</b><br>(0.0002)   | 0.0003<br>(0.0005)           | 0.0003<br>(0.0004)           |
| GDP growth (weaker)                             | 0.0000<br>(0.0001)           | 0.0000<br>(0.0001)           | 0.0002<br>(0.0004)           | 0.0002<br>(0.0003)           |
| Law and order (stronger)                        | <b>0.0029*</b><br>(0.0014)   | <b>0.0029*</b><br>(0.0014)   | 0.0007<br>(0.0028)           | 0.0007<br>(0.0023)           |
| Law and order (weaker)                          | <b>0.0053**</b><br>(0.0013)  | <b>0.005***</b><br>(0.0013)  | <b>0.0108***</b><br>(0.0026) | <b>0.0108***</b><br>(0.0025) |
| Overtook (weaker)*ISDS Respondent cum. (weaker) |                              | -0.0001<br>(0.0005)          |                              |                              |
| Overtook (weaker)*GDP growth (weaker)           |                              | 0.0004<br>(0.0007)           |                              |                              |
| Overtook (weaker)*Law and order (weaker)        |                              | 0.0087<br>(0.0062)           |                              |                              |
| FDI outflows % of GDP (stronger)                |                              |                              | -0.0001<br>(0.0001)          | -0.0001<br>(0.0001)          |
| FDI outflows % of GDP (weaker)                  |                              |                              | 0.0000<br>(0.0001)           | 0.0000<br>(0.0001)           |
| Democ. accountability (stronger)                |                              |                              | -0.0007<br>(0.0029)          | -0.0007<br>(0.0027)          |
| Democ. accountability (weaker)                  |                              |                              | <b>-0.0035*</b><br>(0.0017)  | <b>-0.0035*</b><br>(0.0017)  |
| Socioeconomic conditions (stronger)             |                              |                              | 0.0006<br>(0.0013)           | 0.0006<br>(0.0012)           |
| Socioeconomic conditions (weaker)               |                              |                              | -0.0002<br>(0.0013)          | -0.0002<br>(0.0011)          |
| Government stability (stronger)                 |                              |                              | 0.0011<br>(0.0011)           | 0.0011<br>(0.0010)           |
| Government stability (weaker)                   |                              |                              | -0.0006<br>(0.0010)          | -0.0006<br>(0.0008)          |
| Leader transition (stronger)                    |                              |                              | -0.0015<br>(0.0043)          | -0.0015<br>(0.0038)          |
| Leader transition (weaker)                      |                              |                              | -0.0055<br>(0.0037)          | <b>-0.0055.</b><br>(0.0031)  |
| SOLS change (stronger)                          |                              |                              | 0.0042<br>(0.0050)           | 0.0042<br>(0.0051)           |
| SOLS change (weaker)                            |                              |                              | -0.0006<br>(0.0046)          | -0.0006<br>(0.0035)          |
| Leftist executive (stronger)                    |                              |                              | -0.0010<br>(0.0025)          | -0.0010<br>(0.0028)          |
| Leftist executive (weaker)                      |                              |                              | <b>-0.0086**</b><br>(0.0029) | <b>-0.0086*</b><br>(0.0036)  |
| Bureaucratic quality (stronger)                 |                              |                              | 0.0009<br>(0.0063)           | 0.0009<br>(0.0049)           |
| Bureaucratic quality (weaker)                   |                              |                              | -0.0018<br>(0.0045)          | -0.0018<br>(0.0034)          |
| Year + BIT FEs                                  | ✓                            | ✓                            | ✓                            | ✓                            |
| Dyad-clustered SEs                              |                              |                              |                              | ✓                            |
| Num. obs.                                       | 32802                        | 32802                        | 11841                        | 11841                        |
| R <sup>2</sup> (full model)                     | 0.1149                       | 0.1150                       | 0.1275                       | 0.1275                       |
| Adj. R <sup>2</sup> (full model)                | 0.0568                       | 0.0568                       | 0.0478                       | 0.0478                       |
| Num. groups: Year                               | 34                           | 34                           | 34                           | 34                           |
| Num. groups: BIT number                         | 1979                         | 1979                         | 934                          | 934                          |

\*\*\* p &lt; 0.0001; \*\* p &lt; 0.001; \* p &lt; 0.01; · p &lt; 0.05

**Table A3.** Comparing Linear probability models, Cox PH model, and Fixed Effects Logit model, DV=BIT deviation

|                                                              | <b>LPM1</b>                   | <b>LPM2</b>                   | <b>Cox PH</b>                 | <b>FE Logit</b>               |
|--------------------------------------------------------------|-------------------------------|-------------------------------|-------------------------------|-------------------------------|
| Relative power change $t_{-2}$                               | <b>0.1122***</b><br>(0.0290)  | <b>0.0850**</b><br>(0.0279)   | <b>4.1054***</b><br>(1.2291)  | <b>-10.9903*</b><br>(4.3016)  |
| ISDS Respondent cum. (stronger) $t_{-2}$                     | <b>0.0005**</b><br>(0.0002)   | 0.0002<br>(0.0002)            | <b>0.0292***</b><br>(0.0054)  | <b>6.6841**</b><br>(2.1344)   |
| ISDS Respondent cum. (weaker) $t_{-2}$                       | <b>0.0005**</b><br>(0.0002)   | <b>0.0005**</b><br>(0.0002)   | 0.0112<br>(0.0084)            | <b>14.4765***</b><br>(1.5402) |
| GDP growth (stronger) $t_{-2}$                               | <b>0.0003*</b><br>(0.0001)    | <b>0.0004**</b><br>(0.0001)   | <b>0.0380***</b><br>(0.0045)  | <b>0.1137.</b><br>(0.0656)    |
| GDP growth (weaker) $t_{-2}$                                 | <b>0.0002*</b><br>(0.0001)    | <b>0.0002.</b><br>(0.0001)    | <b>0.0231***</b><br>(0.0047)  | <b>-0.1346**</b><br>(0.0415)  |
| Law and order (stronger) $t_{-2}$                            | 0.0025<br>(0.0016)            | 0.0018<br>(0.0016)            | -0.0701<br>(0.0895)           | -0.3605<br>(0.5337)           |
| Law and order (weaker) $t_{-2}$                              | <b>0.0035*</b><br>(0.0016)    | <b>0.0034*</b><br>(0.0015)    | <b>0.1863**</b><br>(0.0705)   | <b>0.5532.</b><br>(0.3084)    |
| Relative power change*ISDS Respondent cum. (weaker) $t_{-2}$ | <b>-0.0043***</b><br>(0.0012) | <b>-0.0039**</b><br>(0.0012)  | <b>-0.1891***</b><br>(0.0539) | <b>-9.8139***</b><br>(1.3798) |
| Relative power change*GDP growth (weaker) $t_{-2}$           | <b>-0.0023***</b><br>(0.0007) | <b>-0.0026***</b><br>(0.0007) | <b>-0.1697***</b><br>(0.0229) | <b>-0.2701.</b><br>(0.1455)   |
| Relative power change*Law and order (weaker) $t_{-2}$        | <b>-0.0242**</b><br>(0.0074)  | <b>-0.0224**</b><br>(0.0073)  | <b>-0.7380*</b><br>(0.3133)   | <b>-2.4825**</b><br>(0.9248)  |
| FDI outflows % of GDP (stronger) $t_{-2}$                    | -0.0000<br>(0.0000)           | -0.0000<br>(0.0000)           | -0.0042<br>(0.0056)           | 0.0350<br>(0.0232)            |
| FDI outflows % of GDP (weaker) $t_{-2}$                      | 0.0000<br>(0.0001)            | 0.0000<br>(0.0001)            | -0.0014<br>(0.0084)           | <b>0.1750*</b><br>(0.0791)    |
| Democ. accountability (stronger) $t_{-2}$                    | 0.0019<br>(0.0015)            | 0.0007<br>(0.0016)            | <b>0.2159*</b><br>(0.0871)    | -0.0866<br>(0.4662)           |
| Democ. accountability (weaker) $t_{-2}$                      | -0.0002<br>(0.0009)           | -0.0005<br>(0.0009)           | <b>0.1178*</b><br>(0.0562)    | <b>1.1290**</b><br>(0.3552)   |
| Socioeconomic conditions (stronger) $t_{-2}$                 | <b>0.0016*</b><br>(0.0007)    | <b>0.0020**</b><br>(0.0007)   | <b>0.0971*</b><br>(0.0486)    | <b>0.9883***</b><br>(0.2208)  |
| Socioeconomic conditions (weaker) $t_{-2}$                   | <b>0.0015*</b><br>(0.0007)    | 0.0006<br>(0.0007)            | -0.0122<br>(0.0413)           | <b>0.3874*</b><br>(0.1714)    |
| Government stability (stronger) $t_{-2}$                     | 0.0004<br>(0.0006)            | -0.0002<br>(0.0007)           | <b>-0.1213*</b><br>(0.0484)   | -0.0085<br>(0.1488)           |
| Government stability (weaker) $t_{-2}$                       | -0.0002<br>(0.0005)           | -0.0005<br>(0.0005)           | <b>-0.0632.</b><br>(0.0372)   | 0.1196<br>(0.1566)            |
| Leader transition (stronger) $t_{-2}$                        | -0.0021<br>(0.0024)           | -0.0014<br>(0.0025)           | <b>-0.4419.</b><br>(0.2493)   | -0.2271<br>(0.3435)           |
| Leader transition (weaker) $t_{-2}$                          | <b>-0.0046*</b><br>(0.0019)   | <b>-0.0054**</b><br>(0.0019)  | <b>-0.7009*</b><br>(0.3254)   | -0.1186<br>(0.3769)           |
| SOLS change (stronger) $t_{-2}$                              | 0.0051<br>(0.0032)            | 0.0041<br>(0.0033)            | <b>0.8054**</b><br>(0.2879)   | <b>1.3353**</b><br>(0.4148)   |
| SOLS change (weaker) $t_{-2}$                                | 0.0034<br>(0.0025)            | <b>0.0046.</b><br>(0.0025)    | <b>0.6552.</b><br>(0.3702)    | <b>1.0977*</b><br>(0.5196)    |
| Bureaucratic quality (stronger) $t_{-2}$                     | 0.0039<br>(0.0032)            | 0.0033<br>(0.0041)            | <b>-0.2838*</b><br>(0.1182)   | -1.0205<br>(1.6881)           |
| Bureaucratic quality (weaker) $t_{-2}$                       | 0.0007<br>(0.0023)            | 0.0009<br>(0.0022)            | -0.1199<br>(0.0965)           | 0.4720<br>(0.7907)            |
| Year FEs                                                     | ✓                             | ✓                             |                               |                               |
| BIT FEs                                                      | ✓                             |                               |                               | ✓                             |
| Dyad FEs                                                     |                               | ✓                             |                               |                               |
| Num. obs.                                                    | 29116                         | 29116                         | 29116                         | 29116                         |
| R <sup>2</sup> (full model)                                  | 0.1238                        | 0.0868                        |                               |                               |
| Adj. R <sup>2</sup> (full model)                             | 0.0617                        | 0.0252                        |                               |                               |
| Num. groups: Year                                            | 34                            | 34                            |                               |                               |
| Num. groups: BIT number                                      | 1871                          |                               |                               |                               |
| Num. groups: Dyad                                            |                               | 1784                          |                               |                               |
| AIC                                                          |                               |                               | 5501.5370                     | 228.2673                      |
| R <sup>2</sup>                                               |                               |                               | 0.0061                        | 0.0399                        |
| Num. events                                                  |                               |                               | 284                           | 284                           |

\*\*\*p < 0.0001; \*\*p < 0.001; \*p < 0.01; ·p < 0.05; LPM1 SEs clustered at dyad-level; reported coefficients of Cox PH model are the betas of the hazard model, positive values corresponding to increased hazard of BIT deviation

**Table A4.** Comparing LPM results with a subset containing only North-South BITs

|                                                     | LPM, all                      | LPM,<br>North-South           |
|-----------------------------------------------------|-------------------------------|-------------------------------|
| Relative power change                               | <b>0.1614*</b><br>(0.0533)    | <b>0.3280***</b><br>(0.0767)  |
| ISDS Respondent cum. (stronger)                     | -0.0000<br>(0.0003)           | -0.0002<br>(0.0004)           |
| ISDS Respondent cum. (weaker)                       | <b>0.0007*</b><br>(0.0003)    | -0.0001<br>(0.0004)           |
| GDP growth (stronger)                               | 0.0001<br>(0.0004)            | -0.0000<br>(0.0006)           |
| GDP growth (weaker)                                 | 0.0001<br>(0.0003)            | 0.0002<br>(0.0003)            |
| Law and order (stronger)                            | 0.0005<br>(0.0023)            | -0.0034<br>(0.0031)           |
| Law and order (weaker)                              | <b>0.0077***</b><br>(0.0023)  | <b>0.0074*</b><br>(0.0028)    |
| Relative power change*ISDS Respondent cum. (weaker) | <b>-0.0071**</b><br>(0.0025)  | <b>-0.0158***</b><br>(0.0041) |
| Relative power change*GDP growth (weaker)           | <b>-0.0097***</b><br>(0.0022) | <b>-0.0091 **</b><br>(0.0028) |
| Relative power change*Law and order (weaker)        | <b>-0.0362 **</b><br>(0.0129) | <b>-0.0925***</b><br>(0.0197) |
| FDI outflows % of GDP (stronger)                    | -0.0001<br>(0.0001)           | -0.0000<br>(0.0002)           |
| FDI outflows % of GDP (weaker)                      | 0.0000<br>(0.0001)            | -0.0001.<br>(0.0000)          |
| Democ. accountability (stronger)                    | 0.0000<br>(0.0026)            | 0.0006<br>(0.0044)            |
| Democ. accountability (weaker)                      | <b>-0.0034*</b><br>(0.0016)   | -0.0026<br>(0.0021)           |
| Socioeconomic conditions (stronger)                 | 0.0014<br>(0.0012)            | 0.0028.<br>(0.0017)           |
| Socioeconomic conditions (weaker)                   | -0.0011<br>(0.0011)           | <b>-0.0030*</b><br>(0.0014)   |
| Government stability (stronger)                     | 0.0013<br>(0.0010)            | 0.0004<br>(0.0013)            |
| Government stability (weaker)                       | -0.0003<br>(0.0008)           | 0.0008<br>(0.0011)            |
| Leader transition (stronger)                        | -0.0014<br>(0.0038)           | 0.0018<br>(0.0057)            |
| Leader transition (weaker)                          | <b>-0.0052.</b><br>(0.0031)   | -0.0056<br>(0.0040)           |
| SOLS change (stronger)                              | 0.0049<br>(0.0052)            | 0.0025<br>(0.0072)            |
| SOLS change (weaker)                                | -0.0017<br>(0.0034)           | 0.0016<br>(0.0046)            |
| Leftist executive (stronger)                        | -0.0004<br>(0.0028)           | 0.0027<br>(0.0033)            |
| Leftist executive (weaker)                          | <b>-0.0068*</b><br>(0.0033)   | <b>-0.0100*</b><br>(0.0045)   |
| Bureaucratic quality (stronger)                     | 0.0033<br>(0.0047)            | 0.0054<br>(0.0064)            |
| Bureaucratic quality (weaker)                       | -0.0002<br>(0.0032)           | -0.0009<br>(0.0041)           |
| Year + BIT FEs                                      | ✓                             | ✓                             |
| Num. obs.                                           | 11594                         | 8094                          |
| R <sup>2</sup> (full model)                         | 0.1365                        | 0.1643                        |
| Adj. R <sup>2</sup> (full model)                    | 0.0562                        | 0.0818                        |
| Num. groups: Year                                   | 34                            | 34                            |
| Num. groups: BIT number                             | 928                           | 669                           |

\*\*\* p < 0.0001; \*\* p < 0.001; \* p < 0.01; · p < 0.05

**Table A5.** Comparing different ISDS measures, Linear probability models with dyad-clustered SEs, DV = BIT deviation

|                                                     | <b>Model 1</b>                | <b>Model 2</b>                | <b>Model 3</b>               | <b>Model 4</b>               |
|-----------------------------------------------------|-------------------------------|-------------------------------|------------------------------|------------------------------|
| <b>Independent effects</b>                          |                               |                               |                              |                              |
| Relative power change                               | 0.0606<br>(0.0518)            | <b>0.1577*</b><br>(0.0621)    | 0.0200<br>(0.0609)           | 0.0390<br>(0.0569)           |
| ISDS Respondent (stronger)                          | <b>-0.0023**</b><br>(0.0007)  |                               |                              |                              |
| ISDS Respondent (weaker)                            | <b>0.0030**</b><br>(0.0010)   |                               |                              |                              |
| ISDS Respondent cum. (stronger)                     |                               | -0.0001<br>(0.0003)           |                              |                              |
| ISDS Respondent cum. (weaker)                       |                               | <b>0.0009*</b><br>(0.0004)    |                              |                              |
| ISDS Respondent any (stronger)                      |                               |                               | 0.0029<br>(0.0058)           |                              |
| ISDS Respondent any (weaker)                        |                               |                               | 0.0054<br>(0.0045)           |                              |
| ISDS Home cum. (stronger)                           |                               |                               |                              | -0.0001<br>(0.0002)          |
| ISDS Home cum. (weaker)                             |                               |                               |                              | 0.0031<br>(0.0020)           |
| GDP growth (stronger)                               | 0.0003<br>(0.0005)            | -0.0001<br>(0.0005)           | 0.0001<br>(0.0005)           | 0.0001<br>(0.0005)           |
| GDP growth (weaker)                                 | 0.0002<br>(0.0004)            | 0.0001<br>(0.0004)            | 0.0002<br>(0.0004)           | 0.0002<br>(0.0003)           |
| Law and order (stronger)                            | 0.0025<br>(0.0030)            | 0.0008<br>(0.0030)            | 0.0022<br>(0.0030)           | 0.0014<br>(0.0030)           |
| Law and order (weaker)                              | <b>0.0083**</b><br>(0.0026)   | <b>0.0115***</b><br>(0.0029)  | <b>0.0084**</b><br>(0.0026)  | <b>0.0089***</b><br>(0.0026) |
| <b>Interaction effects</b>                          |                               |                               |                              |                              |
| Relative power change*ISDS Respondent (weaker)      | <b>-0.0256*</b><br>(0.0100)   |                               |                              |                              |
| Relative power change*ISDS Respondent cum. (weaker) |                               | <b>-0.0074**</b><br>(0.0027)  |                              |                              |
| Relative power change*ISDS Respondent any (weaker)  |                               |                               | 0.0183<br>(0.0222)           |                              |
| Relative power change*ISDS Home cum. (weaker)       |                               |                               |                              | -0.0017<br>(0.0073)          |
| Relative power change*GDP growth (weaker)           | <b>-0.0079***</b><br>(0.0023) | <b>-0.0090***</b><br>(0.0023) | <b>-0.0075**</b><br>(0.0023) | <b>-0.0075**</b><br>(0.0024) |
| Relative power change*Law and order (weaker)        | <b>-0.0242.</b><br>(0.0135)   | <b>-0.0392*</b><br>(0.0154)   | <b>-0.0229.</b><br>(0.0138)  | -0.0220<br>(0.0134)          |
| Controls                                            | ✓                             | ✓                             | ✓                            | ✓                            |
| Year + BIT FEs                                      | ✓                             | ✓                             | ✓                            | ✓                            |
| Num. obs.                                           | 9554                          | 9554                          | 9554                         | 9554                         |
| R <sup>2</sup> (full model)                         | 0.1701                        | 0.1730                        | 0.1677                       | 0.1684                       |
| Adj. R <sup>2</sup> (full model)                    | 0.0808                        | 0.0840                        | 0.0782                       | 0.0789                       |
| Num. groups: Year                                   | 33                            | 33                            | 33                           | 33                           |
| Num. groups: BIT number                             | 868                           | 868                           | 868                          | 868                          |

\*\*\* p < 0.0001; \*\* p < 0.001; \* p < 0.01; · p < 0.05



**Table A6.** The effect of bargaining power on SRS in new BITs

| DV:                                                 | Delta SRS Subs.               | Delta SRS Subs.              | Delta SRS ISDS                | Delta SRS ISDS                |
|-----------------------------------------------------|-------------------------------|------------------------------|-------------------------------|-------------------------------|
| Relative power change                               | <b>-1.1260**</b><br>(0.3829)  | -0.3846<br>(0.7637)          | -0.6540<br>(0.8010)           | -0.7141<br>(0.9130)           |
| ISDS Respondent cum. (stronger)                     | -0.0005<br>(0.0023)           | 0.0030<br>(0.0028)           | 0.0009<br>(0.0033)            | 0.0037<br>(0.0035)            |
| ISDS Respondent cum. (weaker)                       | 0.0057<br>(0.0079)            | <b>-0.0293*</b><br>(0.0119)  | 0.0082<br>(0.0101)            | <b>-0.0353**</b><br>(0.0135)  |
| GDP growth (stronger)                               | <b>-0.0182***</b><br>(0.0041) | <b>-0.0206**</b><br>(0.0068) | <b>-0.0294***</b><br>(0.0060) | <b>-0.0348***</b><br>(0.0085) |
| GDP growth (weaker)                                 | -0.0019<br>(0.0032)           | 0.0007<br>(0.0063)           | 0.0030<br>(0.0056)            | -0.0056<br>(0.0067)           |
| Law and order (stronger)                            | -0.0271<br>(0.0246)           | -0.0443<br>(0.0416)          | -0.0395<br>(0.0396)           | <b>-0.1045.</b><br>(0.0551)   |
| Law and order (weaker)                              | <b>-0.0654**</b><br>(0.0253)  | <b>-0.1135**</b><br>(0.0375) | <b>-0.0856*</b><br>(0.0400)   | <b>-0.1620***</b><br>(0.0441) |
| Relative power change*ISDS Respondent cum. (weaker) | -0.0329<br>(0.0269)           | <b>-0.1099**</b><br>(0.0376) | -0.0358<br>(0.0480)           | <b>-0.1389**</b><br>(0.0475)  |
| Relative power change*GDP growth (weaker)           | 0.0144<br>(0.0132)            | 0.0093<br>(0.0195)           | -0.0163<br>(0.0312)           | 0.0477.<br>(0.0259)           |
| Relative power change*Law and order (weaker)        | <b>0.2968***</b><br>(0.0878)  | 0.1499<br>(0.1557)           | <b>0.3911.</b><br>(0.1997)    | 0.2633<br>(0.1932)            |
| FDI outflows % of GDP (stronger)                    |                               | <b>0.0029*</b><br>(0.0012)   |                               | <b>0.0034*</b><br>(0.0015)    |
| FDI outflows % of GDP (weaker)                      |                               | 0.0116<br>(0.0117)           |                               | 0.0096<br>(0.0146)            |
| Democ. accountability (stronger)                    |                               | 0.0222<br>(0.0293)           |                               | -0.0042<br>(0.0369)           |
| Democ. accountability (weaker)                      |                               | <b>0.0325.</b><br>(0.0192)   |                               | 0.0149<br>(0.0259)            |
| Socioeconomic conditions (stronger)                 |                               | -0.0013<br>(0.0184)          |                               | 0.0013<br>(0.0237)            |
| Socioeconomic conditions (weaker)                   |                               | -0.0025<br>(0.0212)          |                               | 0.0028<br>(0.0289)            |
| Government stability (stronger)                     |                               | 0.0229<br>(0.0142)           |                               | 0.0176<br>(0.0194)            |
| Government stability (weaker)                       |                               | <b>-0.0287*</b><br>(0.0130)  |                               | <b>-0.0277.</b><br>(0.0152)   |
| Leader transition (stronger)                        |                               | <b>-0.0918**</b><br>(0.0333) |                               | <b>-0.1148**</b><br>(0.0430)  |
| Leader transition (weaker)                          |                               | 0.0444<br>(0.0287)           |                               | 0.0596<br>(0.0369)            |
| SOLS change (stronger)                              |                               | <b>0.0649.</b><br>(0.0375)   |                               | 0.0637<br>(0.0469)            |
| SOLS change (weaker)                                |                               | -0.0189<br>(0.0359)          |                               | -0.0421<br>(0.0443)           |
| Leftist executive (stronger)                        |                               | -0.0114<br>(0.0346)          |                               | -0.0531<br>(0.0496)           |
| Leftist executive (weaker)                          |                               | 0.0120<br>(0.0467)           |                               | -0.0095<br>(0.0539)           |
| Bureaucratic quality (stronger)                     |                               | <b>0.1258*</b><br>(0.0613)   |                               | <b>0.2226**</b><br>(0.0832)   |
| Bureaucratic quality (weaker)                       |                               | <b>0.0976.</b><br>(0.0538)   |                               | <b>0.1886*</b><br>(0.0848)    |
| Year FEs                                            | ✓                             | ✓                            | ✓                             | ✓                             |
| Num. obs.                                           | 1994                          | 844                          | 1994                          | 844                           |
| R <sup>2</sup> (full model)                         | 0.3301                        | 0.5809                       | 0.3638                        | 0.5947                        |
| Adj. R <sup>2</sup> (full model)                    | 0.3160                        | 0.5505                       | 0.3504                        | 0.5653                        |
| Num. groups: Year                                   | 32                            | 32                           | 32                            | 32                            |

\*\*\* p < 0.0001; \*\* p < 0.001; \* p < 0.01; · p < 0.05
